# Supplementary material for: MiRNA-128 regulates the proliferation and neurogenesis of neural precursors by targeting PCM1 in the developing cortex
Source: eLife. 2016 Feb 17;5:e11324. doi: 10.7554/eLife.11324 (PMC4769165; doi:10.7554/eLife.11324)
Supplement: Figure 4—source data 1. — 53 genes with annotated GO terms which were predicted as targets of miR-128 by both TargetScan and miRanda algorithms, were listed. The genes were sorted in alphabetical order. GO information was obtained from the PANTHER website (http://www.pantherdb.org). DOI: http://dx.doi.org/10.7554/eLife.11324.017 [file elife-11324-fig4-data1.xlsx]

## Sheet: Sheet1
Gene IDs	GO Molecular Function	GO Biological Process
Abcb9	ATPase activity, coupled to transmembrane movement of substances; transmembrane transporter activity	immune system process; extracellular transport; response to toxin
Adcy3	adenylate cyclase activity; guanylate cyclase activity	cyclic nucleotide metabolic process
Aldh4a1	oxidoreductase activity	nucleobase, nucleoside, nucleotide and nucleic acid metabolic process; cellular amino acid metabolic process
Cabp1	calcium ion binding; calmodulin binding	cell cycle; calcium-mediated signaling; cell motion
Capza1	structural constituent of cytoskeleton; actin binding	cellular component morphogenesis; cellular component morphogenesis
Col11a2	receptor activity; transmembrane transporter activity; extracellular matrix structural constituent	macrophage activation; blood circulation; intracellular protein transport; receptor-mediated endocytosis; signal transduction; cell-cell adhesion; signal transduction; cellular component morphogenesis; ectoderm development; mesoderm development; cellular component morphogenesis; skeletal system development; angiogenesis; regulation of liquid surface tension; defense response to bacterium; asymmet…
Ddah1	hydrolase activity	mesoderm development; angiogenesis
Dlk1	receptor activity; extracellular matrix structural constituent; transcription factor activity	immune system process; intracellular protein transport; receptor-mediated endocytosis; signal transduction; cell-cell signaling; cell-matrix adhesion; cell-cell adhesion; regulation of transcription from RNA polymerase II promoter; cell motion; ectoderm development; nervous system development
Dot1l	methyltransferase activity	nucleobase, nucleoside, nucleotide and nucleic acid metabolic process
Fbxl20	damaged DNA binding; protein binding; enzyme activator activity	immune system process; cell cycle; DNA repair; proteolysis
Flrt3	receptor activity	cytokine-mediated signaling pathway; cell-cell adhesion; mesoderm development; skeletal system development
Foxo4	transcription factor activity	cell cycle;
Fubp1	RNA splicing factor activity, transesterification mechanism; mRNA binding; protein binding	neurological system process; intracellular protein transport; nuclear transport; induction of apoptosis; signal transduction; transcription from RNA polymerase II promoter; nuclear mRNA splicing, via spliceosome; protein metabolic process; signal transduction
Gatad2a	nucleic acid binding; chromatin binding	regulation of transcription from RNA polymerase II promoter; establishment or maintenance of chromatin architecture
Kcnk10	voltage-gated potassium channel activity	neurological system process; cation transport
Klf4	transcription factor activity	B cell mediated immunity; regulation of transcription from RNA polymerase II promoter; mesoderm development; hemopoiesis; response to stimulus
Lmbr1l	receptor activity	intracellular protein transport; receptor-mediated endocytosis
Mier2	transcription factor activity	general transcription from RNA polymerase II promoter; establishment or maintenance of chromatin architecture; mesoderm development
Mmd	receptor activity	immune system process; cell surface receptor linked signal transduction; fatty acid metabolic process
Mtmr12	-	spermatogenesis; intracellular protein transport; vesicle-mediated transport; phospholipid metabolic process
Ncam1	phosphoprotein phosphatase activity; receptor activity	immune system process; muscle contraction; neurological system process; neurological system process; induction of apoptosis; cell cycle; cell surface receptor linked signal transduction; cell-cell signaling; cell-matrix adhesion; cell-cell adhesion; ectoderm development; nervous system development; mesoderm development; angiogenesis; muscle organ development; cell motion
Neo1	phosphoprotein phosphatase activity; receptor activity	immune system process; muscle contraction; neurological system process; induction of apoptosis; cell cycle; cell surface receptor linked signal transduction; cell-cell signaling; cell-matrix adhesion; cell-cell adhesion; cell motion; ectoderm development; mesoderm development; angiogenesis; nervous system development; muscle organ development
Nfia	transcription factor activity	transcription from RNA polymerase II promoter
Nfx1	transcription factor activity	regulation of transcription from RNA polymerase II promoter
Ngp	protein binding; peptidase inhibitor activity	immune system process; defense response to bacterium
Npr1	adenylate cyclase activity; guanylate cyclase activity	cyclic nucleotide metabolic process
Paip2	-	mRNA polyadenylation
Pcm1	-	cell cycle
Pde1a	phosphoric diester hydrolase activity	visual perception; sensory perception; signal transduction; cyclic nucleotide metabolic process
Pde3a	phosphoric diester hydrolase activity	visual perception; sensory perception; signal transduction; cyclic nucleotide metabolic process
Pde8b	phosphoric diester hydrolase activity	visual perception; sensory perception; signal transduction; cyclic nucleotide metabolic process
Phb	-	cell cycle; DNA replication
Plod3	oxidoreductase activity	cell adhesion; protein metabolic process
Pogz	centromeric DNA binding	transcription from RNA polymerase II promoter; nervous system development; ectoderm development
Ppif	isomerase activity	immune system process; intracellular protein transport; nuclear transport; protein folding
Ppp4c	phosphoprotein phosphatase activity; calcium ion binding	immune system process; apoptosis; mitosis; meiosis; glycogen metabolic process; regulation of carbohydrate metabolic process; transcription from RNA polymerase II promoter; mRNA processing; regulation of nucleobase, nucleoside, nucleotide and nucleic acid metabolic process; response to stress
Rbbp6	nuclease activity	mRNA polyadenylation
Rgl2	protein binding; small GTPase regulator activity; guanyl-nucleotide exchange factor activity	mitosis; transmembrane receptor protein tyrosine kinase signaling pathway; G-protein coupled receptor protein signaling pathway; MAPKKK cascade; mitosis
Rhpn2	protein binding; small GTPase regulator activity	cellular component morphogenesis; cellular component morphogenesis
Rps6ka4	protein kinase activity; calcium ion binding; calmodulin binding; calcium-dependent phospholipid binding	cell cycle; MAPKKK cascade; calcium-mediated signaling; ectoderm development; mesoderm development; skeletal system development; nervous system development
Rybp	transcription factor activity	regulation of transcription from RNA polymerase II promoter
Sec24a	-	intracellular protein transport; vesicle-mediated transport
Sec61a1	transmembrane transporter activity	intracellular protein transport
Sgms1	catalytic activity	lipid metabolic process
Sh2d3c	-	signal transduction
Snx12	-	protein targeting; endocytosis
Stk40	protein kinase activity	protein amino acid phosphorylation
Sv2a	-	neurotransmitter secretion; synaptic transmission
Tia1	RNA splicing factor activity, transesterification mechanism; poly(A) RNA binding; structural constituent of ribosome	neurological system process; cell cycle; DNA replication; nuclear mRNA splicing, via spliceosome; mRNA polyadenylation; rRNA metabolic process; protein metabolic process; ectoderm development; nervous system development
Ubr5	ubiquitin-protein ligase activity	proteolysis; ectoderm development; mesoderm development; nervous system development
Usp42	cysteine-type peptidase activity; ubiquitin-protein ligase activity; RNA splicing factor activity, transesterification mechanism; mRNA binding	gamete generation; proteolysis; nuclear mRNA splicing, via spliceosome
Vegfc	growth factor activity	immune system process; cell cycle; transmembrane receptor protein tyrosine kinase signaling pathway; MAPKKK cascade; cell-cell signaling; mesoderm development; angiogenesis; response to stress
Ypel3	oxidoreductase activity	respiratory electron transport chain; cellular amino acid catabolic process; lipid metabolic process; protein metabolic process
