# Supplementary material for: MiRNA-128 regulates the proliferation and neurogenesis of neural precursors by targeting PCM1 in the developing cortex
Source: eLife. 2016 Feb 17;5:e11324. doi: 10.7554/eLife.11324 (PMC4769165; doi:10.7554/eLife.11324)
Supplement: Figure 4—source data 2. — Cultured NPCs were transfected with either miR-128 or miR-mimic control for 48 hr and were harvested for qPCR analysis. 11 genes (Pcm1, Lmbr1l, Foxo4, Sh2d3c, Nfia, Pde8b, Sec24a, Pde3a, Fbxl20, Ypel3 and Kcnk10) showed consistent and significant reduction in mRNA levels upon miR-128 expression in NPCs (highlighted in yellow). At least three sets of independent experiments were performed. The values represent the mean ± s.d. (n = 3). DOI: http://dx.doi.org/10.7554/eLife.11324.018 [file elife-11324-fig4-data2.xlsx]

## Sheet: 128 overexpression
					t-test values (compared to GAPDH Control)
ID	#	Gene	mRNA Level	SD	P-Value	Significant (Knockdown)
0	1	Pcm1	0.62341	0.1312	< 0.0001	Yes
8	2	Lmbr1l	0.718836	0.2317	0.1703	No
12	3	Foxo4	0.759128	0.198083	0.1698	No
9	4	Sh2d3c	0.762427	0.412679	0.4238	No
14	5	Nfia	0.769882	0.427299	0.4494	No
22	6	Pde8b	0.808584	0.196483	0.2336	No
2	7	Sec24a	0.830726	0.0994472	2	No
11	8	Pde3a	0.840389	0.340343	0.5019	No
18	9	Fbxl20	0.853527	0.267325	0.4428	No
26	10	Ypel3	0.877354	0.367393	0.6216	No
17	11	Kcnk10	0.885646	0.433388	0.6925	No
16	12	Ncam1	0.885961	0.226917	0.4758	No
49	13	Pogz	0.923522	0.27514	0.6777	No
35	14	Npr1	0.930135	0.392591	0.787	No
3	15	Col11a2	0.934633	0.407889	0.8074	No
5	16	Ppp4c	0.940894	0.172458	0.613	No
42	17	Ddah1	0.943035	0.364792	0.8122	No
7	18	Mier2	0.987153	0.377186	0.9583	No
4	19	Rgl2	0.991167	0.178918	0.9396	No
10	20	Nfx1	0.991268	0.106834	0.9004	No
48	21	Neo1	0.997001	0.0586277	0.9375	No
33	22	Fubp1	1.00325	0.837898	0.9953	No
23	23	Capza1	1.04625	0.0443998	0.2129	No
21	24	Pde1a	1.05162	0.116787	0.524	No
13	25	Flrt3	1.05357	0.160104	0.6208	No
44	26	Klf4	1.07636	0.28495	0.6881	No
46	27	Dot1l	1.09253	0.295082	0.6415	No
6	28	Adcy3	1.10228	0.137816	0.3274	No
34	29	Phb	1.10469	0.23867	0.5267	No
39	30	Aldh4a1	1.1251	0.307446	0.554	No
25	31	Usp42	1.12861	0.452918	0.6715	No
30	32	Snx12	1.13875	0.298433	0.5052	No
36	33	Rybp	1.14694	0.310894	0.499	No
24	34	Sv2a	1.15189	0.469838	0.6319	No
50	35	Mmd	1.20106	0.103253	0.0778	No
19	36	Cabp1	1.21596	0.326922	0.371	No
40	37	Rhpn2	1.26097	0.723942	0.5961	No
52	38	Mtmr12	1.26966	0.426167	0.3875	No
29	39	Sgms1	1.31296	0.111483	0.0398	No
51	40	Stk40	1.3396	0.077816	0.0171	No
27	41	Ubr5	1.34589	0.444749	0.3103	No
37	42	Plod3	1.34789	0.555062	0.3911	No
31	43	Ppif	1.35761	0.464836	0.3142	No
41	44	Rps6ka4	1.38956	0.204472	0.0809	No
38	45	Paip2	1.43154	0.704007	0.3996	No
28	46	Tia1	1.48841	0.596384	0.2918	No
1	47	Sec61a1	1.66515	0.910441	0.3332	No
43	48	Abcb9	1.70723	0.856517	0.2889	No
20	49	Gatad2a	1.75286	0.697644	0.2025	No
15	50	Rbbp6	NA	NA
32	51	Ngp	NA	NA
45	52	Dlk1	NA	NA
47		Vegfc	NA	NA
