# Supplementary material for: MiRNA-128 regulates the proliferation and neurogenesis of neural precursors by targeting PCM1 in the developing cortex
Source: eLife. 2016 Feb 17;5:e11324. doi: 10.7554/eLife.11324 (PMC4769165; doi:10.7554/eLife.11324)
Supplement: Figure 4—source data 3. — NPC primary cultures were transfected with either miR-Zip-128 or miR-Zip scramble control, and mRNAs of 11 target genes were measured via qPCR analysis. Only PCM1 was significantly upregulated upon anti-miR-128 expression in NPCs. At least three sets of independent experiments were performed. The values represent the mean ± s.d. (n = 3). DOI: http://dx.doi.org/10.7554/eLife.11324.019 [file elife-11324-fig4-data3.xlsx]

## Sheet: 128 knockdown
ID	#	Gene	mRNA Level	SD
17	1	Ypel3	0.759777	0.180484
26	2	Kcnk10	0.882838	0.155887
18	3	Pde3a	0.90485	0.0250723
11	4	Pde8b	0.905136	0.0327157
2	5	Sec24a	0.937927	0.0602171
22	6	Lmbr1l	0.981475	0.054152
14	7	Sh2d3c	0.990318	0.0502891
9	8	Fbxl20	1.01682	0.126893
12	9	Foxo4	1.08019	0.0466479
8	10	Nfia	1.10875	0.397971
0	11	Pcm1	4.35124	0.423852
