# Supplementary material for: MiRNA-128 regulates the proliferation and neurogenesis of neural precursors by targeting PCM1 in the developing cortex
Source: eLife. 2016 Feb 17;5:e11324. doi: 10.7554/eLife.11324 (PMC4769165; doi:10.7554/eLife.11324)
Supplement: Figure 4—source data 4. — DOI: http://dx.doi.org/10.7554/eLife.11324.020 [file elife-11324-fig4-data4.xlsx]

## Sheet: Sheet1
Gene	Forward primer (5'-->3')	Reverse Primer (5'-->3')
Sec61a1	GAGAGGCATTCTACCGCCAGAA	GCCGACTTGATTGGAAGGTCCA
Sec24a	CTGAAACCACGAGAGGAACCCA	TGCCCAGAACAGTCCAAGGCTA
Col11a2	AGGACGGCTTTCCTGGGTTCAA	TGTAGGTCCAGTGCGCCCTTTT
Rgl2	CTGCTTCGGAACTTCTCCTCAG	ACAGGCTGGAAAAGACTCGGAG
Ppp4c	GAGACTTTGTGGACCGTGGTTTC	TGGGTAATCTGGCGACTCTCATG
Adcy3	CCTCTGAGGATGAGCACGAACT	GAGTAGCGTGTTTCCATCTCTGG
Mier2	CAAGCTGACCTCAACATCCTGC	ATCTCCTGCCACCTCCGTTTCA
Lmbr1l	TCTCCTTCCTCGGAGTTCTGCT	CCTCAAAGGCTGAGCAGTTCAG
Sh2d3c	GCCACATGAAGAGGCGAAGCAT	GGCACAGTTTCGGATGGAGTCT
Nfx1	ATCTACCCACCAGTTCCCTGTG	GGACACTTCTCCTCGCTATGAC
Pde3a	ATACCTGCTCGGACTCTGAGGA	TGGCAGAGGTGGTAGTTGTCCA
Foxo4	TCTACGAATGGATGGTCCGCAC	CTTGCTGTGCAAGGACAGGTTG
Flrt3	GGCTATCAAGGACCTCAGTGCA	CTGGTTGTTTGGTCACAGGAGC
Nfia	TGGACAGTCCTGGTGAAGAACC	CTTCAGTGTGCTTGGAGATGGC
Rbbp6	TCCATATCTCCCTCTGCGAT	AGATGAGTTCTTAGGAATGAGCG
Ncam1	GGTTCCGAGATGGTCAGTTGCT	CAAGGACTCCTGTCCAATACGG
Kcnk10	CTGTCCTCAGTATGATCGGAGAC	CAGCAGTGACATTAGCCTTCCAC
Fbxl20	CAGTAACTGGCAACGGATAGACC	CCTACTCCAAGACACCCACGAA
Cabp1	GGTGTAAAGGAGCTGAGAGACG	CATTGAGGTCCACGTCTCGGAT
Gatad2a	GGACTTATCCGTGTCGCCAATG	GTGGAATTTGCCTGAGCAGAAGC
Pde1a	TAGCCATGGTCTTTGCAGCTGC	CAAGCACTGAGCGGTCGTTGTA
Pde8b	TTACGGACCACAGAACTGTATTCC	CCTGACAGTCTCCTCAAGCCAT
Capza1	TGACAATCTCCTCAGGGAAGGG	CTGCTGTTACCAAGGTCACCATG
Sv2a	TCCAGTCTGACACAGGAACCTG	GCCGATACTCTGGACTGAAGCA
Pcm1	GCAACAGCGGCTAACAACAA	AGACGCTCAACATTGGCAGA
Usp42	CAGTGACTCACAAGAGAACAGCC	GGAACAGACTGCAAAGGAGCAG
Ypel3	CGTGCCTACCTCTTCAACTCTG	TTCCAGCCCAAAGTGGTCTTGC
Ubr5	CGTCCTTCAGGACTGGAATGCT	CTCTGCTGGTTGAGGTAGACCT
Tia1	GCCAGTATGTGCCTAACGGTTG	CTTGAGGTGGTGGCACACTGTA
Sgms1	GCATAGTTGGCACGCTGTACCT	TAAGCCACCTCCAGCAATGAGC
Snx12	CTTTCCGAGGAGATGAAGGGATC	GACAGCGTTCATTCTGAGCCAG
Ppif	GCAGATGTCGTGCCAAAGACTG	GCCATTGTGGTTGGTGAAGTCG
Ngp	CAATATCCCACTCCAGTTCAGG	CAGGAAGTCGCAGTCTTTAGG
Fubp1	CCTCTTAGGATTACGGGTGACC	TCCGCACTTCTCTGAAACCACC
Phb	CACCACAGAGATCCTCAAGTCG	GGACACGTCATCCAGGATAAGC
Npr1	TTCCACACTGGAGGTTCTGGCT	CTCTGAGACCAGCTCCTTTTCC
Rybp	AGCATCTGCGATGTGCGGAAAG	GTCAGGCTTTTCGACCTTCTCC
Plod3	CGTGTTTGTGGAGCAGCCTACT	GGCATCTGCAATATGAGGCTCG
Paip2	GAGGATAATCCATTTGCAGAGTAC	AGCATTTCTTGGAAACAGCGTTCA
Aldh4a1	AACTTCACCGCGATTGGAGGCA	TAGCCAGCATGGCAGTGTCACT
Rhpn2	TCTTCGTGCTGGTAAAGGTGGC	GCCCACGAATACGGGATGTTCT
Rps6ka4	CAACGTGGTGAATCTGCATGAGG	AGCCGCTTCTTGCGGATGTGTT
Ddah1	CAAAGGGCATGTCTTGCTGCAC	TCCATCTCCGAGTTGCTCACAG
Abcb9	TCTCTTCCGCTCACTGGTGTCA	GACTTTGACCGTGTTCCTCAGG
Klf4	CTATGCAGGCTGTGGCAAAACC	TTGCGGTAGTGCCTGGTCAGTT
Dlk1	TGGCTGTGTCAATGGAGTCTGC	CCACGCAAGTTCCATTGTTGGC
Dot1l	TGGAGAAGGACAACAGCGAGCT	CTCTTTCCGCAGGTTCTCCAAG
Vegfc	CCTGAATCCTGGGAAATGTGCC	CGATTCGCACACGGTCTTCTGT
Neo1	TGACATGGCGTACACCTGCATC	GGCTGGTATTCTCAACACGCTC
Pogz	CCTAAGGTTGCCACGTCTTTCC	AACAGTGCTGGCAGATGGTGTG
Mmd	CACGATGGGATTTTCTCCAGCC	CAAACAGGTGCCAGATGGCATG
Stk40	AGGCTCTCAGTGCCATCATTGC	CTCGTATTGGGAGCACTCCTCT
Mtmr12	TGAAGGCTACCGAGTCTCTGAC	CATTGTGACAGGACCAACACCAG
U6 forward primer	CTCGCTTCGGCAGCACA	AACGCTTCACGAATTTGCGT
Actin forward primer	AGATGTGGATCAGCAAGCAG	GCGCAAGTTAGGTTTTGTCA
mmu-miR-128 primer	TCACAGUGAACCGGTCTCTTT	miScript Universal Primer, QIAGEN
